# Supplementary material
Source: PubMed Central journal article supplement (PMC3029692)
Supplement: 1011293108_pnas.201011293SI.pdf [file 1011293108_pnas.201011293SI.pdf]

# Supporting Information

Kumasawa et al. 10.1073/pnas.1011293108

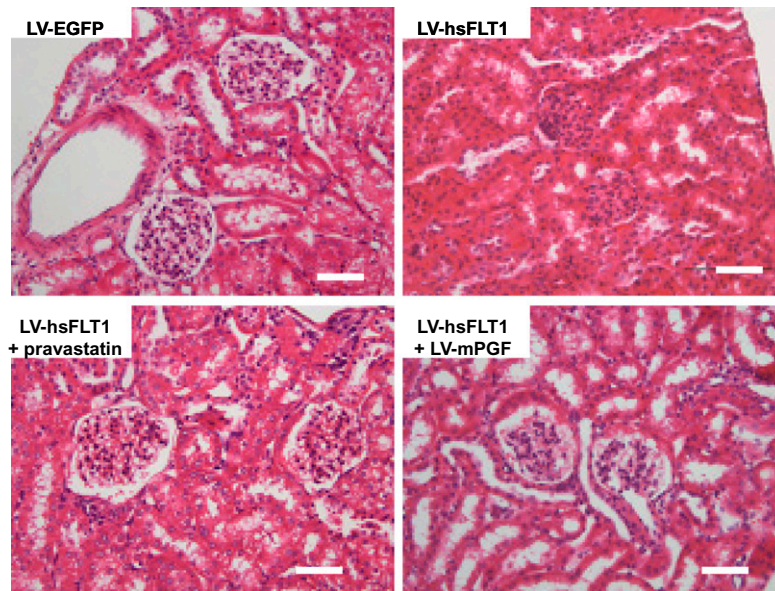

**Fig. S1.** Restored glomerular sclerosis in preeclampsia by pravastatin treatment or *mPgf* overexpression. Glomerular sclerosis was observed in the females carrying LV-hsFLT1-transduced placentas. The kidney was collected at E18.5, and the sections were stained with H&E. The symptoms were rescued by pravastatin treatment or placenta-specific *mPgf* expression. (Scale bar = 50  $\mu$ m.)

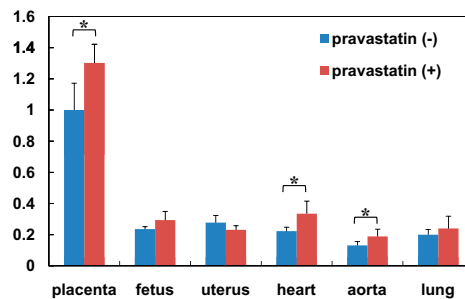

**Fig. S2.** Pravastatin induced *mPgf* expression in various tissues. Pravastatin (5  $\mu$ g/d) was i.p. administered into the pregnant females every day from E7.5, and then the *mPgf* mRNA amounts in total RNA were measured by quantitative RT-PCR at E13.5 ( $n = 4$ ). Pravastatin significantly increased the *mPgf* mRNA in placenta, heart, and aorta (\* $P < 0.05$ ).

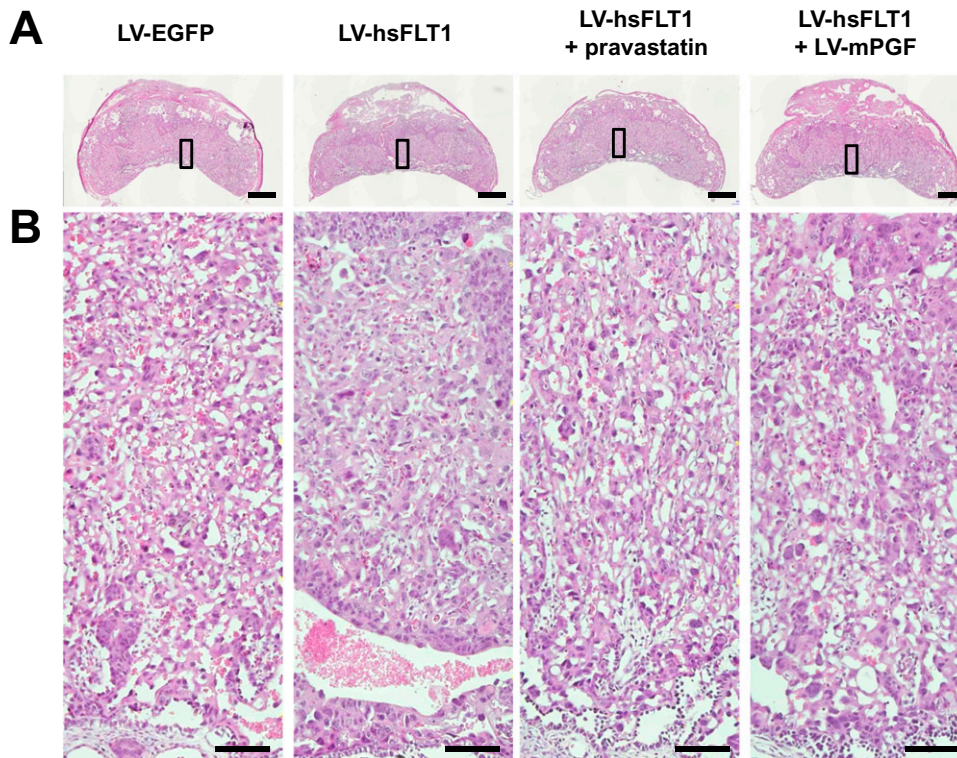

**Fig. S3.** Restored placentation by pravastatin treatment or *mPgf* overexpression. The placenta was collected at E13.5, and the sections were stained with H&E. Labyrinthine area in *A* is magnified in *B*. The maternal and fetal blood spaces were reduced in the labyrinthine layer of the LV-hsFLT1–transduced placenta. The phenotypes were rescued by pravastatin treatment or placenta-specific *mPgf* expression. (Scale bar = 1 mm in *A* and 100  $\mu$ m in *B*.)

**Table S1. Implantation and birth rate**

| Lentiviral vector       | <i>n</i> | Transferred | Implanted, %         | Born, %             |
|-------------------------|----------|-------------|----------------------|---------------------|
| LV-EGFP                 | 11       | 220         | 99 (45.0 $\pm$ 1.8)  | 82 (37.3 $\pm$ 1.7) |
| LV-hsFLT1               | 11       | 220         | 100 (45.5 $\pm$ 2.0) | 85 (38.6 $\pm$ 2.5) |
| LV-hsFLT1 + pravastatin | 10       | 200         | 89 (44.5 $\pm$ 0.9)  | 76 (38.0 $\pm$ 1.0) |
| LV-hsFLT1 + LV-mPGF     | 12       | 240         | 108 (45.0 $\pm$ 1.2) | 90 (37.5 $\pm$ 1.3) |

Blastocysts were transduced with lentiviral vectors at 100 ng of p24/mL. Pravastatin was administered at 5  $\mu$ g per body every day starting at E7.5. Implantation rate was analyzed at E13.5 (average  $\pm$  SEM). Student's *t* test was performed against LV-EGFP treatment.

**Table S2. Liver enzymes**

| Lentiviral vector       | <i>n</i> | Aspartate transaminase<br>average, U/mL | <i>P</i> | <i>n</i> | Alanine transaminase<br>average, U/mL | <i>P</i> |
|-------------------------|----------|-----------------------------------------|----------|----------|---------------------------------------|----------|
| LV-EGFP                 | 9        | 85 $\pm$ 16.2                           | —        | 9        | 27.7 $\pm$ 3.0                        | —        |
| LV-hsFLT1               | 10       | 190 $\pm$ 64.5                          | 0.15     | 10       | 32.1 $\pm$ 9.7                        | 0.68     |
| LV-hsFLT1 + pravastatin | 9        | 113 $\pm$ 13.3                          | 0.21     | 9        | 28.9 $\pm$ 3.7                        | 0.80     |
| LV-hsFLT1 + LV-mPGF     | 13       | 124 $\pm$ 23.0                          | 0.23     | 12       | 32.4 $\pm$ 6.7                        | 0.57     |

Blastocysts were transduced with lentiviral vectors at 100 ng of p24/mL. Pravastatin was administered at 5  $\mu$ g per body every day starting at E7.5. Blood samples were collected at E18.5 and analyzed (average  $\pm$  SEM). Student's *t* test was performed against LV-EGFP treatment.
